# Supplementary material
Source: publisher figshare collection journal article supplement (https://acs.figshare.com/ndownloader/files/5318626)
Supplement: Supplementary file 1 [file 5318626]

 
data_cis-8i
 
_audit_creation_method            SHELXL-97 
_chemical_name_systematic 
; 
(5R*,6S*)-5-fluoro-6-(1H-inden-3-yl)-1,3-dimethyldihydropyrimidine-
2,4(1H,3H)-dione
; 
_chemical_name_common             ? 
_chemical_melting_point           445-446 
_chemical_formula_moiety           'C15 H15 F N2 O2' 
_chemical_formula_sum 
 'C15 H15 F N2 O2' 
_chemical_formula_weight          274.29 
 
loop_ 
 _atom_type_symbol 
 _atom_type_description 
 _atom_type_scat_dispersion_real 
 _atom_type_scat_dispersion_imag 
 _atom_type_scat_source 
 'C'  'C'   0.0033   0.0016 
 'International Tables Vol C Tables 4.2.6.8 and 6.1.1.4' 
 'H'  'H'   0.0000   0.0000 
 'International Tables Vol C Tables 4.2.6.8 and 6.1.1.4' 
 'N'  'N'   0.0061   0.0033 
 'International Tables Vol C Tables 4.2.6.8 and 6.1.1.4' 
 'O'  'O'   0.0106   0.0060 
 'International Tables Vol C Tables 4.2.6.8 and 6.1.1.4' 
 'F'  'F'   0.0171   0.0103 
 'International Tables Vol C Tables 4.2.6.8 and 6.1.1.4' 
 
_symmetry_cell_setting            monoclinic
_symmetry_space_group_name_H-M    'P 21/c'
_symmetry_space_group_name_Hall   '-P 2ybc'
 
loop_ 
 _symmetry_equiv_pos_as_xyz 
 'x, y, z' 
 '-x, y+1/2, -z+1/2' 
 '-x, -y, -z' 
 'x, -y-1/2, z-1/2' 
 
_cell_length_a                    10.753(13) 
_cell_length_b                    6.215(7) 
_cell_length_c                    20.39(3) 
_cell_angle_alpha                 90.00 
_cell_angle_beta                  102.38(5) 
_cell_angle_gamma                 90.00 
_cell_volume                      1331(3) 
_cell_formula_units_Z             4 
_cell_measurement_temperature     298(2) 
_cell_measurement_reflns_used     4800
_cell_measurement_theta_min       3.1
_cell_measurement_theta_max       26.9 
 
_exptl_crystal_description        'block'
_exptl_crystal_colour             'colorless'
_exptl_crystal_size_max           0.50 
_exptl_crystal_size_mid           0.25 
_exptl_crystal_size_min           0.15 
_exptl_crystal_density_meas       ? 
_exptl_crystal_density_diffrn     1.368 
_exptl_crystal_density_method     'not measured' 
_exptl_crystal_F_000              576 
_exptl_absorpt_coefficient_mu     0.101 
_exptl_absorpt_correction_type    multi-scan  
_exptl_absorpt_correction_T_min   0.9510 
_exptl_absorpt_correction_T_max   0.9849 
_exptl_absorpt_process_details    
;
    Higashi, T. (1995). Program for Absorption Correction.
    Rigaku Corporation, Tokyo, Japan.
;
 
_diffrn_ambient_temperature       298(2) 
_diffrn_radiation_wavelength      0.71075 
_diffrn_radiation_type            MoK\a 
_diffrn_radiation_source          'fine-focus sealed tube' 
_diffrn_radiation_monochromator   graphite 
_diffrn_measurement_device_type   'Rigaku RAXIS-RAPID'
_diffrn_measurement_method        \w
_diffrn_detector_area_resol_mean  10.00
_diffrn_standards_number          ? 
_diffrn_standards_interval_count  ? 
_diffrn_standards_interval_time   ? 
_diffrn_standards_decay_%         ? 
_diffrn_reflns_number             12242 
_diffrn_reflns_av_R_equivalents   0.0350 
_diffrn_reflns_av_sigmaI/netI     0.0370 
_diffrn_reflns_limit_h_min        -13 
_diffrn_reflns_limit_h_max        13 
_diffrn_reflns_limit_k_min        -8 
_diffrn_reflns_limit_k_max        7 
_diffrn_reflns_limit_l_min        -26 
_diffrn_reflns_limit_l_max        26 
_diffrn_reflns_theta_min          3.11 
_diffrn_reflns_theta_max          27.47 
_reflns_number_total              2981 
_reflns_number_gt                 1891 
_reflns_threshold_expression      >2sigma(I) 
 
_computing_data_collection        'PROCESS-AUTO'
_computing_cell_refinement        'PROCESS-AUTO'
_computing_data_reduction         'PROCESS-AUTO'
_computing_structure_solution     'SHELXS-97 (Sheldrick, 1990)' 
_computing_structure_refinement   'SHELXL-97 (Sheldrick, 1997)' 
_computing_molecular_graphics     ? 
_computing_publication_material   'yadokari-XG'
 
_refine_special_details 
; 
 Refinement of F^2^ against ALL reflections.  The weighted R-factor wR and 
 goodness of fit S are based on F^2^, conventional R-factors R are based 
 on F, with F set to zero for negative F^2^. The threshold expression of 
 F^2^ > 2sigma(F^2^) is used only for calculating R-factors(gt) etc. and is 
 not relevant to the choice of reflections for refinement.  R-factors based 
 on F^2^ are statistically about twice as large as those based on F, and R- 
 factors based on ALL data will be even larger. 
; 
 
_refine_ls_structure_factor_coef  Fsqd  
_refine_ls_matrix_type            full 
_refine_ls_weighting_scheme       calc  
_refine_ls_weighting_details 
 'calc w=1/[\s^2^(Fo^2^)+(0.0562P)^2^+0.0000P] where P=(Fo^2^+2Fc^2^)/3' 
_atom_sites_solution_primary      direct 
_atom_sites_solution_secondary    difmap 
_atom_sites_solution_hydrogens    geom 
_refine_ls_hydrogen_treatment     refall 
_refine_ls_extinction_method      none 
_refine_ls_extinction_coef        ? 
_refine_ls_number_reflns          2981 
_refine_ls_number_parameters      183 
_refine_ls_number_restraints      0 
_refine_ls_R_factor_all           0.0825 
_refine_ls_R_factor_gt            0.0427 
_refine_ls_wR_factor_ref          0.1060 
_refine_ls_wR_factor_gt           0.0963 
_refine_ls_goodness_of_fit_ref    1.003 
_refine_ls_restrained_S_all       1.003 
_refine_ls_shift/su_max           0.000 
_refine_ls_shift/su_mean          0.000 
 
loop_ 
 _atom_site_label 
 _atom_site_type_symbol 
 _atom_site_fract_x 
 _atom_site_fract_y 
 _atom_site_fract_z 
 _atom_site_U_iso_or_equiv 
 _atom_site_adp_type 
 _atom_site_occupancy 
 _atom_site_symmetry_multiplicity 
 _atom_site_calc_flag 
 _atom_site_refinement_flags 
 _atom_site_disorder_assembly 
 _atom_site_disorder_group 
N1 N 0.80635(13) -0.0238(2) 0.45772(6) 0.0491(3) Uani 1 1 d . . . 
C1 C 0.7670(2) -0.1430(3) 0.51136(9) 0.0765(6) Uani 1 1 d . . . 
H1 H 0.6893 -0.2187 0.4935 0.115 Uiso 1 1 calc R . . 
H2 H 0.7535 -0.0446 0.5455 0.115 Uiso 1 1 calc R . . 
H3 H 0.8321 -0.2442 0.5305 0.115 Uiso 1 1 calc R . . 
C2 C 0.90189(14) -0.1040(2) 0.43164(8) 0.0497(4) Uani 1 1 d . . . 
O1 O 0.96395(11) -0.26184(17) 0.45426(6) 0.0733(4) Uani 1 1 d . . . 
N2 N 0.92659(12) -0.00086(19) 0.37429(7) 0.0503(3) Uani 1 1 d . . . 
C3 C 1.00751(16) -0.1157(3) 0.33592(11) 0.0782(6) Uani 1 1 d . . . 
H4 H 0.9917 -0.0611 0.2909 0.117 Uiso 1 1 calc R . . 
H5 H 0.9881 -0.2666 0.3350 0.117 Uiso 1 1 calc R . . 
H6 H 1.0954 -0.0944 0.3569 0.117 Uiso 1 1 calc R . . 
C4 C 0.88376(14) 0.1995(2) 0.35426(8) 0.0500(4) Uani 1 1 d . . . 
O2 O 0.90121(13) 0.2839(2) 0.30348(7) 0.0802(4) Uani 1 1 d . . . 
C5 C 0.81840(14) 0.3125(2) 0.40278(8) 0.0469(4) Uani 1 1 d . . . 
H7 H 0.8830 0.3693 0.4401 0.056 Uiso 1 1 calc R . . 
F1 F 0.74811(9) 0.48114(13) 0.37005(5) 0.0656(3) Uani 1 1 d . . . 
C6 C 0.73095(13) 0.1625(2) 0.43042(7) 0.0432(4) Uani 1 1 d . . . 
H8 H 0.7060 0.2366 0.4680 0.052 Uiso 1 1 calc R . . 
C7 C 0.61036(13) 0.1075(2) 0.38023(7) 0.0397(3) Uani 1 1 d . . . 
C8 C 0.59121(14) -0.0573(2) 0.33702(8) 0.0471(4) Uani 1 1 d . . . 
H9 H 0.6523 -0.1606 0.3339 0.057 Uiso 1 1 calc R . . 
C9 C 0.45924(14) -0.0550(2) 0.29423(8) 0.0494(4) Uani 1 1 d . . . 
H10 H 0.4135 -0.1858 0.2999 0.059 Uiso 1 1 calc R . . 
H11 H 0.4607 -0.0376 0.2471 0.059 Uiso 1 1 calc R . . 
C10 C 0.40102(13) 0.1375(2) 0.32069(7) 0.0445(4) Uani 1 1 d . . . 
C11 C 0.27972(14) 0.2214(3) 0.30188(9) 0.0557(4) Uani 1 1 d . . . 
H12 H 0.2190 0.1555 0.2686 0.067 Uiso 1 1 calc R . . 
C12 C 0.25058(16) 0.4048(3) 0.33348(10) 0.0668(5) Uani 1 1 d . . . 
H13 H 0.1693 0.4635 0.3212 0.080 Uiso 1 1 calc R . . 
C13 C 0.34003(18) 0.5027(3) 0.38306(10) 0.0643(5) Uani 1 1 d . . . 
H14 H 0.3182 0.6261 0.4038 0.077 Uiso 1 1 calc R . . 
C14 C 0.46248(16) 0.4195(3) 0.40249(8) 0.0530(4) Uani 1 1 d . . . 
H15 H 0.5228 0.4865 0.4357 0.064 Uiso 1 1 calc R . . 
C15 C 0.49257(13) 0.2340(2) 0.37115(7) 0.0402(3) Uani 1 1 d . . . 
 
loop_ 
 _atom_site_aniso_label 
 _atom_site_aniso_U_11 
 _atom_site_aniso_U_22 
 _atom_site_aniso_U_33 
 _atom_site_aniso_U_23 
 _atom_site_aniso_U_13 
 _atom_site_aniso_U_12 
N1 0.0543(7) 0.0458(7) 0.0413(7) 0.0121(6) -0.0029(6) -0.0075(6) 
C1 0.0938(14) 0.0799(13) 0.0505(11) 0.0201(9) 0.0036(10) -0.0235(11) 
C2 0.0446(8) 0.0352(8) 0.0571(10) 0.0013(7) -0.0165(8) -0.0078(7) 
O1 0.0692(7) 0.0404(6) 0.0901(9) 0.0087(6) -0.0279(7) 0.0031(6) 
N2 0.0435(7) 0.0453(7) 0.0589(8) -0.0002(6) 0.0039(6) 0.0006(6) 
C3 0.0559(10) 0.0819(13) 0.0966(15) -0.0220(12) 0.0164(11) 0.0056(10) 
C4 0.0434(8) 0.0495(9) 0.0535(10) 0.0088(8) 0.0025(7) -0.0104(7) 
O2 0.0836(9) 0.0866(9) 0.0743(9) 0.0265(7) 0.0260(7) -0.0048(7) 
C5 0.0467(8) 0.0322(7) 0.0546(9) 0.0063(7) -0.0054(7) -0.0025(7) 
F1 0.0580(6) 0.0376(5) 0.0904(7) 0.0154(5) -0.0081(5) 0.0035(4) 
C6 0.0474(8) 0.0419(8) 0.0380(8) -0.0032(6) 0.0040(7) -0.0007(7) 
C7 0.0428(7) 0.0396(7) 0.0365(7) 0.0010(6) 0.0077(6) -0.0024(6) 
C8 0.0479(8) 0.0418(8) 0.0489(9) -0.0029(7) 0.0041(7) 0.0032(7) 
C9 0.0503(8) 0.0458(8) 0.0479(9) -0.0051(7) 0.0011(7) -0.0060(7) 
C10 0.0432(8) 0.0493(8) 0.0422(8) 0.0062(7) 0.0122(7) -0.0037(7) 
C11 0.0431(8) 0.0678(10) 0.0550(10) 0.0049(8) 0.0074(7) -0.0014(8) 
C12 0.0496(9) 0.0816(12) 0.0713(12) 0.0102(10) 0.0179(9) 0.0151(9) 
C13 0.0713(11) 0.0608(10) 0.0694(12) -0.0028(9) 0.0343(10) 0.0158(9) 
C14 0.0588(10) 0.0536(9) 0.0493(9) -0.0063(8) 0.0177(8) -0.0012(8) 
C15 0.0430(7) 0.0434(7) 0.0369(8) 0.0021(6) 0.0146(6) -0.0027(7) 
 
_geom_special_details 
; 
 All esds (except the esd in the dihedral angle between two l.s. planes) 
 are estimated using the full covariance matrix.  The cell esds are taken 
 into account individually in the estimation of esds in distances, angles 
 and torsion angles; correlations between esds in cell parameters are only 
 used when they are defined by crystal symmetry.  An approximate (isotropic) 
 treatment of cell esds is used for estimating esds involving l.s. planes. 
; 
 
loop_ 
 _geom_bond_atom_site_label_1 
 _geom_bond_atom_site_label_2 
 _geom_bond_distance 
 _geom_bond_site_symmetry_2 
 _geom_bond_publ_flag 
N1 C2 1.350(2) . ? 
N1 C6 1.454(2) . ? 
N1 C1 1.457(3) . ? 
C1 H1 0.9600 . ? 
C1 H2 0.9600 . ? 
C1 H3 0.9600 . ? 
C2 O1 1.220(2) . ? 
C2 N2 1.408(3) . ? 
N2 C4 1.360(2) . ? 
N2 C3 1.474(2) . ? 
C3 H4 0.9600 . ? 
C3 H5 0.9600 . ? 
C3 H6 0.9600 . ? 
C4 O2 1.211(2) . ? 
C4 C5 1.505(3) . ? 
C5 F1 1.3783(19) . ? 
C5 C6 1.516(2) . ? 
C5 H7 0.9800 . ? 
C6 C7 1.509(2) . ? 
C6 H8 0.9800 . ? 
C7 C8 1.338(2) . ? 
C7 C15 1.468(2) . ? 
C8 C9 1.498(3) . ? 
C8 H9 0.9300 . ? 
C9 C10 1.503(2) . ? 
C9 H10 0.9700 . ? 
C9 H11 0.9700 . ? 
C10 C11 1.381(3) . ? 
C10 C15 1.398(2) . ? 
C11 C12 1.378(3) . ? 
C11 H12 0.9300 . ? 
C12 C13 1.378(3) . ? 
C12 H13 0.9300 . ? 
C13 C14 1.391(3) . ? 
C13 H14 0.9300 . ? 
C14 C15 1.390(2) . ? 
C14 H15 0.9300 . ? 
 
loop_ 
 _geom_angle_atom_site_label_1 
 _geom_angle_atom_site_label_2 
 _geom_angle_atom_site_label_3 
 _geom_angle 
 _geom_angle_site_symmetry_1 
 _geom_angle_site_symmetry_3 
 _geom_angle_publ_flag 
C2 N1 C6 123.52(14) . . ? 
C2 N1 C1 118.46(16) . . ? 
C6 N1 C1 117.66(16) . . ? 
N1 C1 H1 109.5 . . ? 
N1 C1 H2 109.5 . . ? 
H1 C1 H2 109.5 . . ? 
N1 C1 H3 109.5 . . ? 
H1 C1 H3 109.5 . . ? 
H2 C1 H3 109.5 . . ? 
O1 C2 N1 123.29(18) . . ? 
O1 C2 N2 119.66(17) . . ? 
N1 C2 N2 117.03(14) . . ? 
C4 N2 C2 123.67(14) . . ? 
C4 N2 C3 118.99(17) . . ? 
C2 N2 C3 117.30(16) . . ? 
N2 C3 H4 109.5 . . ? 
N2 C3 H5 109.5 . . ? 
H4 C3 H5 109.5 . . ? 
N2 C3 H6 109.5 . . ? 
H4 C3 H6 109.5 . . ? 
H5 C3 H6 109.5 . . ? 
O2 C4 N2 123.30(17) . . ? 
O2 C4 C5 122.70(16) . . ? 
N2 C4 C5 113.93(15) . . ? 
F1 C5 C4 108.74(15) . . ? 
F1 C5 C6 109.16(14) . . ? 
C4 C5 C6 111.85(14) . . ? 
F1 C5 H7 109.0 . . ? 
C4 C5 H7 109.0 . . ? 
C6 C5 H7 109.0 . . ? 
N1 C6 C7 114.00(13) . . ? 
N1 C6 C5 107.01(14) . . ? 
C7 C6 C5 113.48(14) . . ? 
N1 C6 H8 107.3 . . ? 
C7 C6 H8 107.3 . . ? 
C5 C6 H8 107.3 . . ? 
C8 C7 C15 108.67(13) . . ? 
C8 C7 C6 127.49(13) . . ? 
C15 C7 C6 123.84(13) . . ? 
C7 C8 C9 111.64(14) . . ? 
C7 C8 H9 124.2 . . ? 
C9 C8 H9 124.2 . . ? 
C8 C9 C10 102.36(13) . . ? 
C8 C9 H10 111.3 . . ? 
C10 C9 H10 111.3 . . ? 
C8 C9 H11 111.3 . . ? 
C10 C9 H11 111.3 . . ? 
H10 C9 H11 109.2 . . ? 
C11 C10 C15 121.12(16) . . ? 
C11 C10 C9 129.97(15) . . ? 
C15 C10 C9 108.90(14) . . ? 
C12 C11 C10 118.59(17) . . ? 
C12 C11 H12 120.7 . . ? 
C10 C11 H12 120.7 . . ? 
C11 C12 C13 121.00(17) . . ? 
C11 C12 H13 119.5 . . ? 
C13 C12 H13 119.5 . . ? 
C12 C13 C14 120.94(17) . . ? 
C12 C13 H14 119.5 . . ? 
C14 C13 H14 119.5 . . ? 
C15 C14 C13 118.48(16) . . ? 
C15 C14 H15 120.8 . . ? 
C13 C14 H15 120.8 . . ? 
C14 C15 C10 119.86(15) . . ? 
C14 C15 C7 131.75(14) . . ? 
C10 C15 C7 108.39(14) . . ? 
 
loop_ 
 _geom_torsion_atom_site_label_1 
 _geom_torsion_atom_site_label_2 
 _geom_torsion_atom_site_label_3 
 _geom_torsion_atom_site_label_4 
 _geom_torsion 
 _geom_torsion_site_symmetry_1 
 _geom_torsion_site_symmetry_2 
 _geom_torsion_site_symmetry_3 
 _geom_torsion_site_symmetry_4 
 _geom_torsion_publ_flag 
C6 N1 C2 O1 -179.16(13) . . . . ? 
C1 N1 C2 O1 -6.2(2) . . . . ? 
C6 N1 C2 N2 -1.05(19) . . . . ? 
C1 N1 C2 N2 171.94(13) . . . . ? 
O1 C2 N2 C4 -164.88(13) . . . . ? 
N1 C2 N2 C4 16.94(19) . . . . ? 
O1 C2 N2 C3 12.78(19) . . . . ? 
N1 C2 N2 C3 -165.40(13) . . . . ? 
C2 N2 C4 O2 -177.06(14) . . . . ? 
C3 N2 C4 O2 5.3(2) . . . . ? 
C2 N2 C4 C5 6.00(19) . . . . ? 
C3 N2 C4 C5 -171.62(12) . . . . ? 
O2 C4 C5 F1 20.21(19) . . . . ? 
N2 C4 C5 F1 -162.83(11) . . . . ? 
O2 C4 C5 C6 140.84(15) . . . . ? 
N2 C4 C5 C6 -42.20(17) . . . . ? 
C2 N1 C6 C7 93.05(18) . . . . ? 
C1 N1 C6 C7 -79.99(19) . . . . ? 
C2 N1 C6 C5 -33.28(18) . . . . ? 
C1 N1 C6 C5 153.69(13) . . . . ? 
F1 C5 C6 N1 173.77(11) . . . . ? 
C4 C5 C6 N1 53.39(16) . . . . ? 
F1 C5 C6 C7 47.15(17) . . . . ? 
C4 C5 C6 C7 -73.24(16) . . . . ? 
N1 C6 C7 C8 -32.6(2) . . . . ? 
C5 C6 C7 C8 90.3(2) . . . . ? 
N1 C6 C7 C15 147.94(14) . . . . ? 
C5 C6 C7 C15 -89.20(18) . . . . ? 
C15 C7 C8 C9 0.80(17) . . . . ? 
C6 C7 C8 C9 -178.73(14) . . . . ? 
C7 C8 C9 C10 -1.49(17) . . . . ? 
C8 C9 C10 C11 -179.05(15) . . . . ? 
C8 C9 C10 C15 1.63(16) . . . . ? 
C15 C10 C11 C12 0.7(2) . . . . ? 
C9 C10 C11 C12 -178.57(15) . . . . ? 
C10 C11 C12 C13 -0.3(3) . . . . ? 
C11 C12 C13 C14 0.2(3) . . . . ? 
C12 C13 C14 C15 -0.5(3) . . . . ? 
C13 C14 C15 C10 0.9(2) . . . . ? 
C13 C14 C15 C7 -179.55(15) . . . . ? 
C11 C10 C15 C14 -1.0(2) . . . . ? 
C9 C10 C15 C14 178.38(13) . . . . ? 
C11 C10 C15 C7 179.35(13) . . . . ? 
C9 C10 C15 C7 -1.25(16) . . . . ? 
C8 C7 C15 C14 -179.28(15) . . . . ? 
C6 C7 C15 C14 0.3(2) . . . . ? 
C8 C7 C15 C10 0.30(17) . . . . ? 
C6 C7 C15 C10 179.85(13) . . . . ? 
 
_diffrn_measured_fraction_theta_max    0.982 
_diffrn_reflns_theta_full              27.47 
_diffrn_measured_fraction_theta_full   0.982 
_refine_diff_density_max    0.200 
_refine_diff_density_min   -0.173 
_refine_diff_density_rms    0.035 
